# Supplementary material
Source: PubMed Central journal article supplement (PMC4811701)
Supplement: NIHMS749167-supplement-01.pdf [file NIHMS749167-supplement-01.pdf]

**Title: Patient Characteristics and Outcomes in Adolescents and Young Adults (AYA) with Acute Myeloid Leukemia (AML)**

**Supplemental Data (Tables 1S-4S)**

**Table 1S: Overall Survival- Distribution by Cytogenetic Group by Treatment Era for AML AYA group**

| <b>Overall Survival , 5-year %</b> |          |                  |                  |                  |                |
|------------------------------------|----------|------------------|------------------|------------------|----------------|
|                                    | <b>N</b> | <b>1965-1984</b> | <b>1985-2000</b> | <b>2001-2009</b> | <b>p-value</b> |
| <b>CBF</b>                         | 73       | 29               | 49               | 77               | 0.028          |
| <b>APL</b>                         | 51       | 18               | 47               | 91               | 0.033          |
| <b>Diploid</b>                     | 97       | 20               | 38               | 44               | 0.12           |
| <b>Other</b>                       | 211      | 9                | 21               | 27               | 0.31           |

**Table 2S: Complete Remission Duration-- Distribution by Cytogenetic Group by Treatment Era AML AYA group**

| <b>Complete Remission Duration, 5-year %</b> |          |                  |                  |                  |                |
|----------------------------------------------|----------|------------------|------------------|------------------|----------------|
|                                              | <b>N</b> | <b>1965-1984</b> | <b>1985-2000</b> | <b>2001-2009</b> | <b>p-value</b> |
| <b>CBF</b>                                   | 68       | 23               | 44               | 67               | 0.055          |
| <b>APL</b>                                   | 40       | 29               | 47               | 79               | 0.21           |
| <b>Diploid</b>                               | 76       | 30               | 24               | 33               | 0.12           |
| <b>Other</b>                                 | 145      | 16               | 22               | 42               | 0.32           |

| <b>Table 3S: Univariate Analysis, Diploid cytogenetics group</b> |           |                |                    |                |           |                |
|------------------------------------------------------------------|-----------|----------------|--------------------|----------------|-----------|----------------|
| <b>Variable</b>                                                  | <b>CR</b> |                | <b>CR duration</b> |                | <b>OS</b> |                |
|                                                                  | <b>OR</b> | <b>p-value</b> | <b>Median (mo)</b> | <b>p-value</b> | <b>HR</b> | <b>p-value</b> |
| <b>Age, years</b>                                                |           |                |                    |                |           |                |
| <b>≥30</b>                                                       |           |                | 12.0               |                |           |                |
| <b>16-29</b>                                                     | 1.77      | 0.022          | 10.0               | 0.139          | 0.65      | 0.001          |
| <b>Prior chemo/Radiation</b>                                     |           |                |                    |                |           |                |
| <b>No</b>                                                        |           |                | 12.10              |                |           |                |
| <b>Yes</b>                                                       | 0.61      | 0.026          | 9.30               | 0.069          | 1.45      | 0.002          |
| <b>Treatment</b>                                                 |           |                |                    |                |           |                |
| <b>HDAC+Anthracycline</b>                                        |           |                | 12.95              |                |           |                |
| <b>Fludarabine-based</b>                                         | 0.70      | 0.082          | 10.90              |                | 1.39      | 0.003          |
| <b>HDAC, no anthracycline</b>                                    | 0.63      | 0.007          | 10.40              |                | 1.45      | <0.001         |
| <b>ARAC, not high dose</b>                                       | 0.79      | 0.154          | 12.30              |                | 1.23      | 0.019          |
| <b>Other</b>                                                     | 0.21      | <0.001         | 12.20              | <0.001         | 2.09      | <0.001         |
| <b>NPM1</b>                                                      |           |                |                    |                |           |                |
| <b>Negative</b>                                                  |           |                | 8.85               |                |           |                |

|                  |      |       |       |        |      |       |
|------------------|------|-------|-------|--------|------|-------|
| <b>Positive</b>  | 1.87 | 0.122 | 9.05  | 0.063  | 0.86 | 0.569 |
| <b>FLT3-ITD</b>  |      |       |       |        |      |       |
| <b>Negative</b>  |      |       | 12.30 |        |      |       |
| <b>Positive</b>  | 0.69 | 0.063 | 6.40  | <0.001 | 2.19 | 0.569 |
| <b>FLT3-D835</b> |      |       |       |        |      |       |
| <b>Negative</b>  |      |       | 10.40 |        |      |       |
| <b>Positive</b>  | 1.28 | 0.483 | 11.50 | 0.541  | 0.96 | 0.828 |

**Table 4S: Multivariate Analysis, Diploid cytogenetic group**

| Variable                      | CR   |                 | CR duration |                 | OS   |                 |
|-------------------------------|------|-----------------|-------------|-----------------|------|-----------------|
|                               | OR   | <i>p</i> -value | $\beta$     | <i>p</i> -value | OR   | <i>p</i> -value |
| <b>Age, years</b>             |      |                 |             |                 |      |                 |
| <b>≥30</b>                    |      |                 |             |                 |      |                 |
| <b>16-29</b>                  | 1.68 | 0.073           | 6.06        | 0.245           | 0.77 | 0.052           |
| <b>Prior chemo/Radiation</b>  |      |                 |             |                 |      |                 |
| <b>No</b>                     |      |                 |             |                 |      |                 |
| <b>Yes</b>                    | 0.53 | 0.058           | -3.74       | 0.666           | 1.60 | 0.007           |
| <b>Treatment</b>              |      |                 |             |                 |      |                 |
| <b>HDAC+Anthracycline</b>     |      |                 |             |                 |      |                 |
| <b>Fludarabine-based</b>      | 0.88 | 0.571           | 44.85       | 0.002           | 1.24 | 0.055           |
| <b>HDAC, no anthracycline</b> | 0.73 | 0.086           | 12.02       | 0.069           | 1.33 | 0.003           |
| <b>ARAC, not high dose</b>    | 0.76 | 0.153           | 5.74        | 0.114           | 1.39 | 0.001           |
| <b>Other</b>                  | 0.21 | <0.001          | 9.56        | 0.186           | 2.18 | <0.001          |
|                               |      |                 |             |                 |      |                 |

|                  |      |       |       |        |      |        |
|------------------|------|-------|-------|--------|------|--------|
| <b>NPM1</b>      |      |       |       |        |      |        |
| <b>Negative</b>  | 1.86 | 0.131 | 6.19  | 0.062  | 0.90 | 0.693  |
| <b>Positive</b>  |      |       |       |        |      |        |
| <b>FLT3-ITD</b>  |      |       |       |        |      |        |
| <b>Negative</b>  |      |       |       |        |      |        |
| <b>Positive</b>  | 0.68 | 0.053 | -8.75 | <0.001 | 2.22 | <0.001 |
| <b>FLT3-D835</b> |      |       |       |        |      |        |
| <b>Negative</b>  |      |       |       |        |      |        |
| <b>Positive</b>  | 1.26 | 0.510 | 2.33  | 0.538  | 0.95 | 0.803  |
